# Supplementary material for: Biogenic gold nanoparticles-reduced graphene oxide nanohybrid: synthesis, characterization and application in chemical and biological reduction of nitroaromatics
Source: Royal Society of Chemistry journal article supplement (doi:10.1039/c5ra19806b), 2015-01-01
Supplement: c5ra19806b1.pdf [file c5ra19806b1.pdf]

## Electronic Supplementary Information

### **Biogenic gold nanoparticles-reduced graphene oxide nanohybrid: synthesis, characterization and application in chemical and biological reduction of nitroaromatics**

Bin Dong,<sup>a</sup> Guangfei Liu,<sup>a\*</sup> Jiti Zhou,<sup>a</sup> Aijie Wang,<sup>b\*</sup> Jing Wang,<sup>a</sup> Ruofei Jin,<sup>a</sup> and Hong Lv<sup>a</sup>

<sup>a</sup>Key Laboratory of Industrial Ecology and Environmental Engineering, Ministry of Education, School of Environmental Science and Technology, Dalian University of Technology, Dalian 116024, China

<sup>b</sup>State Key Laboratory of Urban Water Resource and Environment, Harbin Institute of Technology, Harbin 150090, China

Electronic supplementary information consists of “Experimental”, 14 figures and 1 table, 19 pages in total.

---

\* Corresponding author.

Tel/fax: +86 411 84706252; E-mail: [guangfeiliu@dlut.edu.cn](mailto:guangfeiliu@dlut.edu.cn) (Guangfei Liu)

Tel/fax: +86 451 86282195; E-mail: [waj0578@hit.edu.cn](mailto:waj0578@hit.edu.cn) (Aijie Wang)

## **Experimental**

### *Preparation of GO*

GO was prepared from graphite powder by modified Hummers' method. In brief, 1.0 g of graphite powder was mixed with 10 mL of HNO<sub>3</sub> and 46 mL of H<sub>2</sub>SO<sub>4</sub> in an ice bath under stirring for 30 min. Then, 6.0 g of KMnO<sub>4</sub> was slowly added to the mixture with stirring for 20 min and kept in an ice bath for at least 120 min. This solution was then heated at 35°C overnight, and subsequently diluted with 46 mL of ultrapure water (the temperature went up to about 98°C) and kept for 120 min. After that, the solution was further diluted by the addition of 200 mL ultrapure water, followed by adding 20 mL H<sub>2</sub>O<sub>2</sub> dropwise. The obtained bright yellow solution was centrifuged at 5000 rpm for 30 min to isolate graphite oxide precipitate, which was washed with 10% HCl for three times and ultrapure water for several times till the supernatant became neutral, and finally re-suspended in ultrapure water. The aqueous graphite oxide solution was then sonicated for 3 h to facilitate the exfoliation of stacked graphite oxide sheets into mono- or few-layered GO sheets.

### *Characterization methods*

The UV-vis spectra of GO and bio-AuNPs/rGO were obtained with JASCO V-560 spectrophotometer. Transmission electron microscopy (TEM) images of bio-AuNPs/rGO were obtained with Tecnai G2 spirit TEM operating at 120 kV and a NOVA nanosem 450 high resolution transmission electron microscopy (HRTEM) operating at 300 kV. Energy dispersive X-ray (EDX) analysis was performed using EDX analyzer fitted with the TEM. X-ray diffraction (XRD) studies were performed with a Rigaku D/max 2400 X-ray diffractometer (Cu K $\alpha$  radiation,  $\lambda$ = 0.1541 nm). Fourier Transformation Infrared

spectroscopy (FTIR) was recorded by a Bruker Equinox 55 FTIR spectrometer over the wavenumber range of 4000-400  $\text{cm}^{-1}$ . The X-ray photoelectron spectroscopy (XPS) analyses of GO and bio-AuNPs/rGO were conducted with Thermo Scientific K-Alpha X-ray photoelectron spectrometer. XPS peaks were deconvoluted by using Gaussian components after a Tougaard background subtraction. The concentrations of bio-AuNPs/rGO, bio-AuNPs, and bio-rGO suspensions were determined through the dry weight method. The samples were re-dissolved in aqua regia for the measurement of Au concentration with a Perkin-Elmer 200-DV inductively coupled plasma optical emission spectrometer.

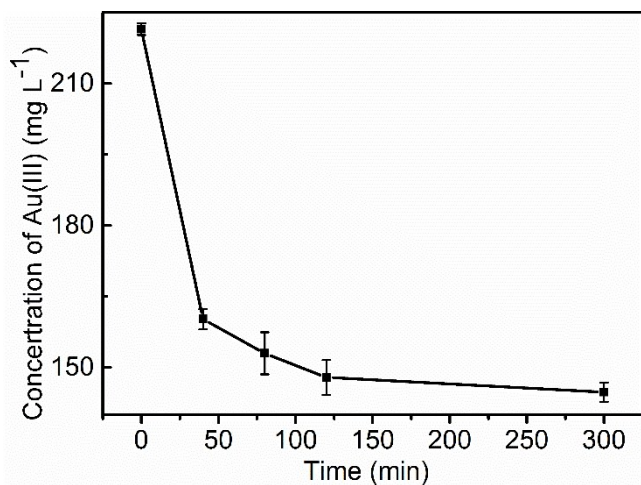

**Fig. S1.** Adsorption of Au(III) ions on GO. The change of Au(III) concentration in a separated adsorption experiment of HAuCl<sub>4</sub> by GO (the initial concentrations of GO and Au(III) were 950 mg/L and 221 mg/L, respectively, 30°C, 150 rpm).

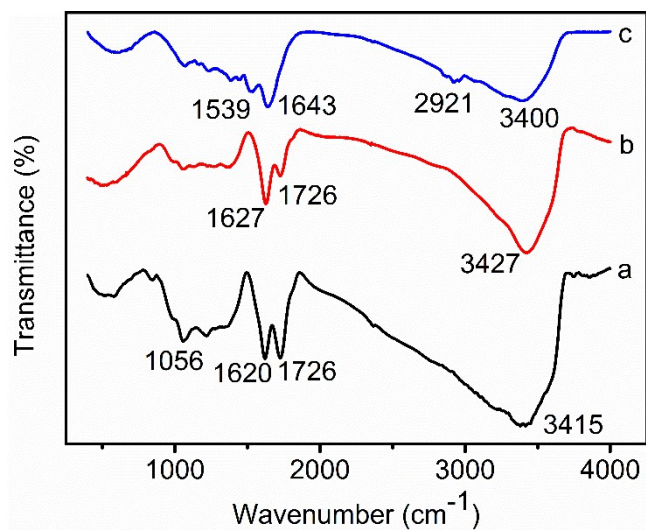

**Fig. S2.** FTIR spectra of (a) GO, (b) GO and HAuCl<sub>4</sub> mixture, and (c) bio-AuNPs/rGO.

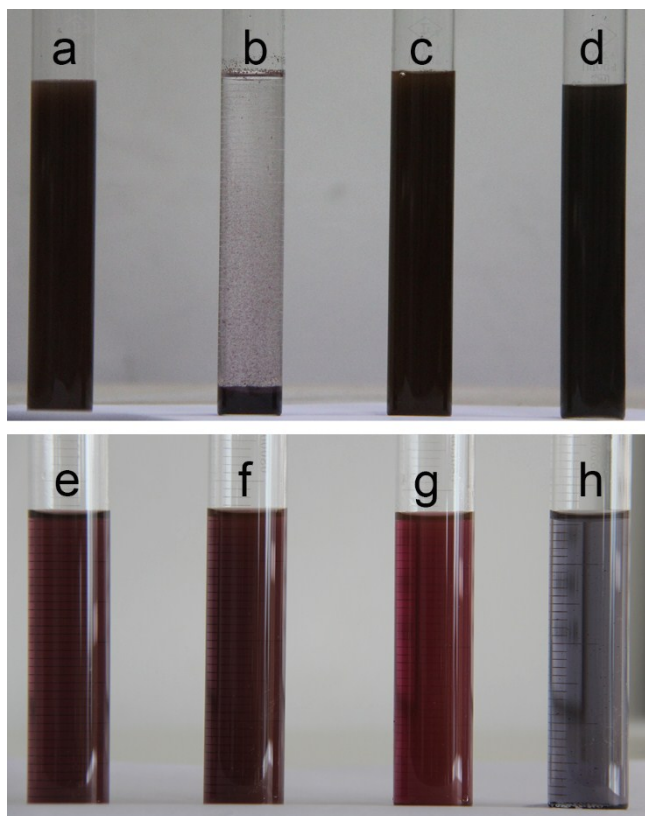

**Fig. S3.** Digital pictures of reduction products obtained under different conditions before (upper line) and after (lower line) alkaline washing. (a, e) GO and  $\text{HAuCl}_4$  were added together into MR-1 culture in LB medium, (b, f) MR-1 suspension in pure water, (c, g) spent LB medium without cell and (d, h) fresh LB medium without inoculation to test the involvement of different components in formation of bio-AuNPs/rGO.

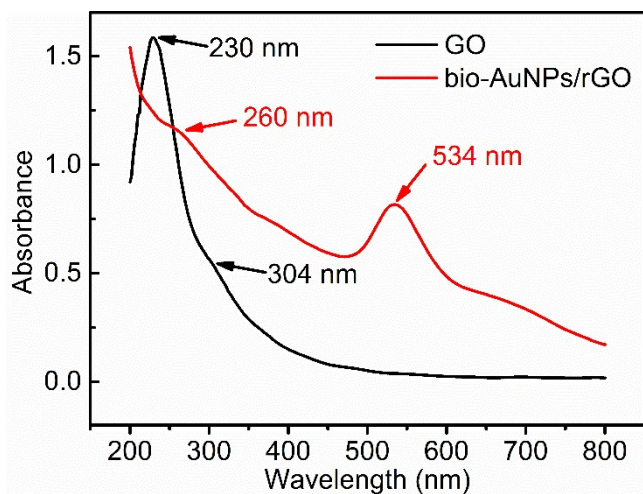

**Fig. S4.** UV-vis absorption spectra of GO and bio-AuNPs/rGO.

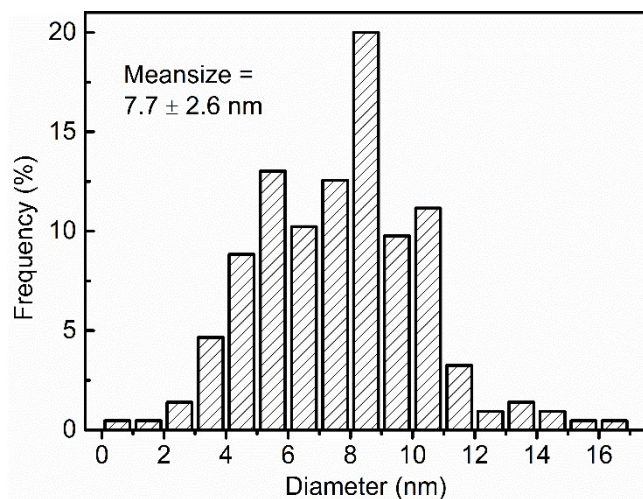

**Fig. S5.** Histogram of the AuNPs size distribution analysis of the bio-AuNPs/rGO nanocomposite from TEM images.



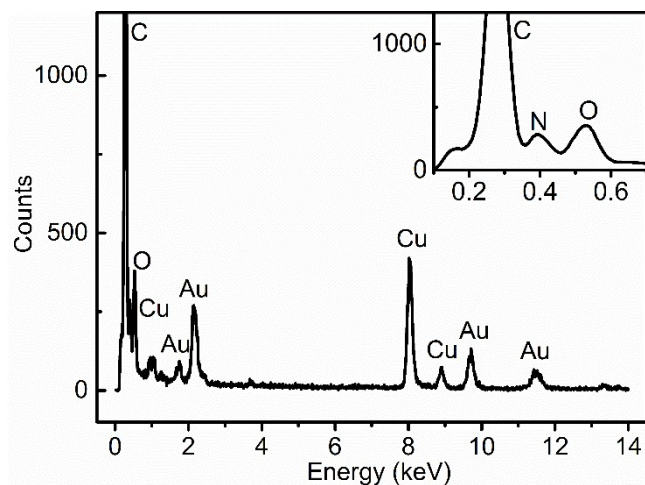

**Fig. S6.** EDX analysis of bio-AuNPs/rGO. The inset is the detailed view of the energy range from 0.1 to 0.7 keV.

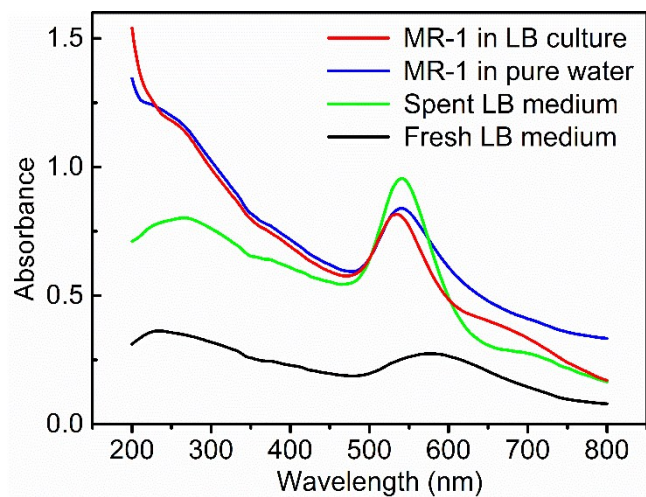

**Fig. S7.** UV-vis absorption spectra of reduction products synthesized under different conditions (MR-1 in LB culture, MR-1 in pure water, spent LB medium without cell and fresh LB medium without inoculation).

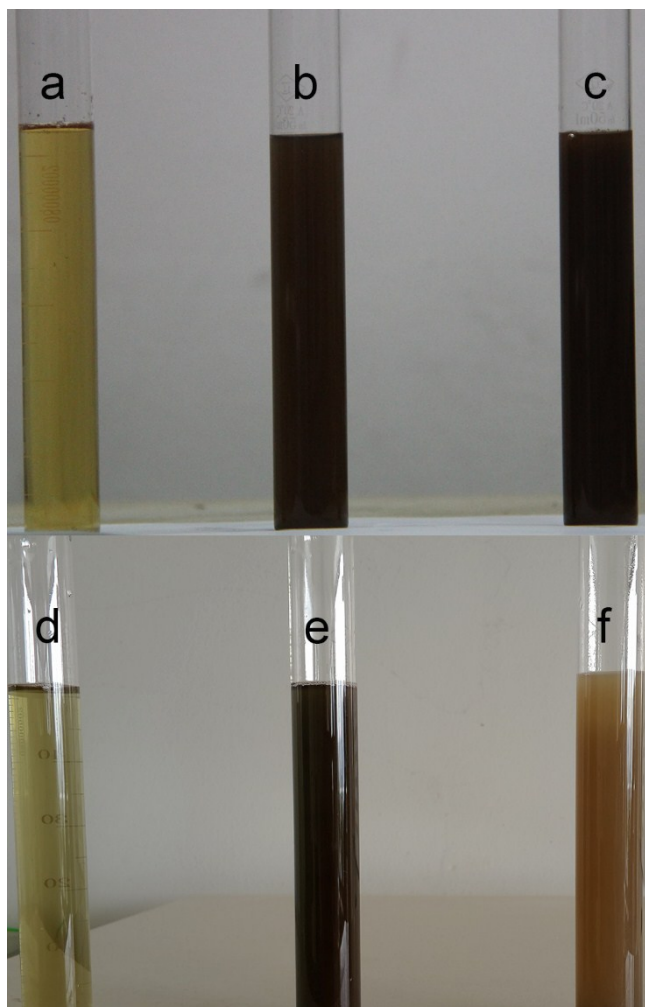

**Fig. S8.** Digital pictures of spent LB medium without cell (upper line) and fresh LB medium without inoculation (lower line) after incubating with (a, d) H<sub>Au</sub>Cl<sub>4</sub>, (b, e) H<sub>Au</sub>Cl<sub>4</sub> and GO mixture, and (c, f) GO for 48 h.

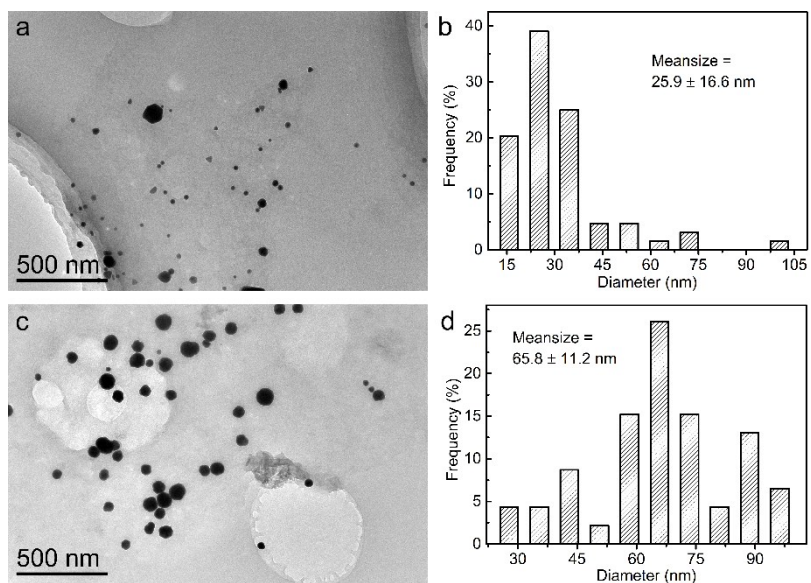

**Fig. S9.** TEM images and corresponding AuNPs size distribution analysis of AuNPs/rGO nanocomposites prepared by MR-1 suspension in (a, b) pure water and (c, d) spent LB medium.

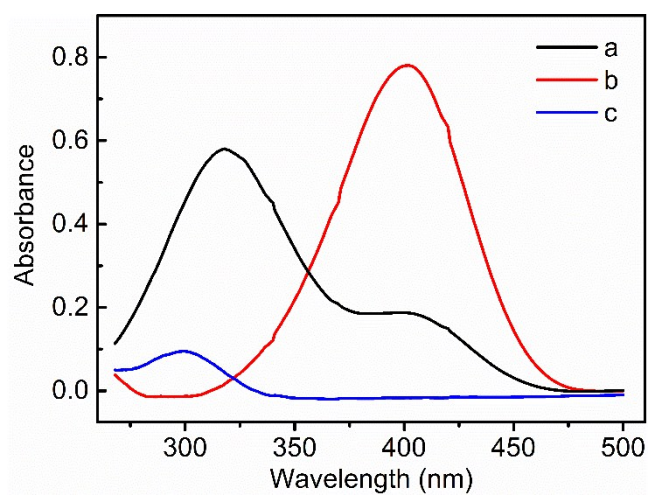

**Fig. S10.** UV-vis spectra of (a) the 4-NP solution, the aqueous mixture of 4-NP and  $\text{NaBH}_4$  (b) before and (c) after reduction.

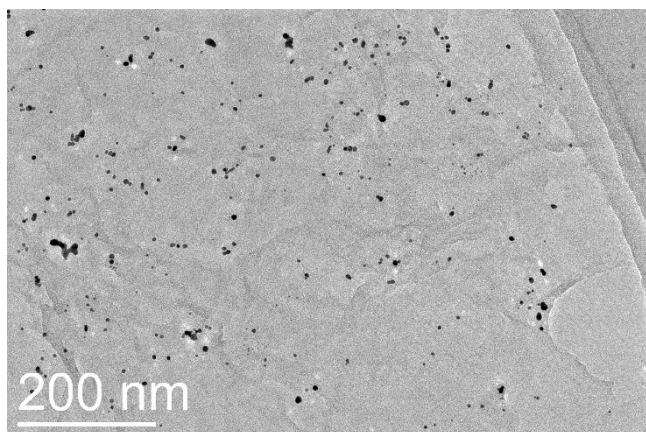

**Fig. S11.** TEM image of bio-AuNPs/rGO after catalyzing ten rounds of chemical reduction of 4-NP.

**Table S1.** Nitrobenzene bioreduction by *Shewanella* species in different studies.

| Initial nitrobenzene concentration (mg/L) | Reduction time (h) | Species                             | Biomass amount (mg (dry weight)/mL) | Nanomaterials       | NB reduction rate (mg (NB) mg <sup>-1</sup> (cell dry weight) h <sup>-1</sup> ) | Refs       |
|-------------------------------------------|--------------------|-------------------------------------|-------------------------------------|---------------------|---------------------------------------------------------------------------------|------------|
|                                           |                    |                                     |                                     |                     | 0.0452                                                                          |            |
|                                           |                    |                                     |                                     | bio-AuNPs/rGO       | 0.0678                                                                          |            |
| 220                                       | 48                 | <i>Shewanella oneidensis</i> MR-1   | 0.049                               | bio-AuNPs           | 0.0466                                                                          | this study |
|                                           |                    |                                     |                                     | bio-rGO             | 0.0540                                                                          |            |
|                                           |                    |                                     |                                     | bio-AuNPs + bio-rGO | 0.0514                                                                          |            |
|                                           |                    |                                     |                                     | chem-AuNPs/rGO      | 0.0462                                                                          |            |
| 18                                        | 24                 | <i>Shewanella putrefaciens</i> CN32 | 0.028                               |                     | 0.0268                                                                          | ref. 1     |
| 185                                       | 24                 | <i>Shewanella oneidensis</i> MR-1   | 0.140                               |                     | 0.0551                                                                          | ref. 2     |
| 200                                       | 24                 | <i>Shewanella</i> sp. XB            | 0.200                               |                     | 0.0417                                                                          | ref. 3     |
| 100                                       | 174                | <i>Shewanella oneidensis</i> MR-1   | 0.014,                              | CNT                 | 0.0392                                                                          | ref. 4     |

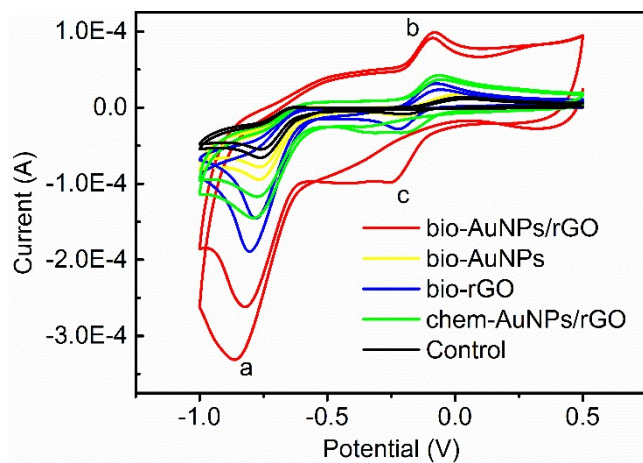

**Fig. S12.** Effects of different nanomaterials on electrochemical reduction of nitrobenzene. Cyclic voltammograms for polished glass carbon electrode and different nanomaterials modified electrodes in M-R2A medium containing nitrobenzene (200 mg/L) at a scan rate of 100 mV/s.



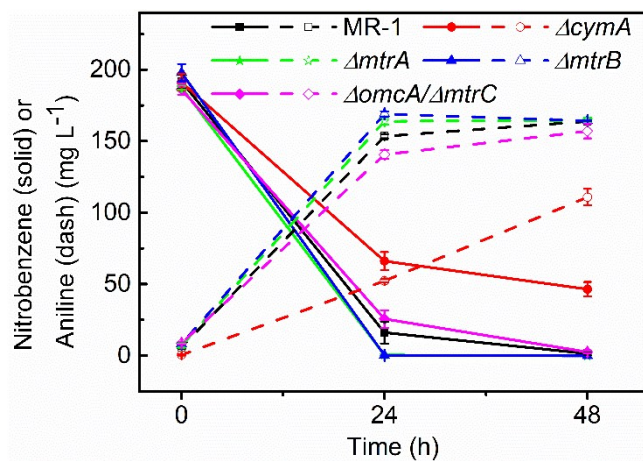

**Fig. S13.** The changes of nitrobenzene (solid) and aniline (dash) concentrations during nitrobenzene bioreduction by *S. oneidensis* MR-1 wild-type and mutant strains at cell concentration of  $6 \times 10^8$  cells/mL.

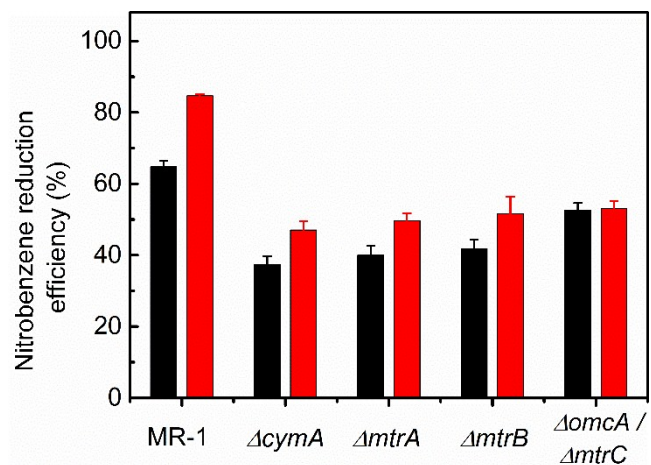

**Fig. S14.** Nitrobenzene reduction efficiency in 120 h by *S. oneidensis* MR-1 wild-type and mutant strains in the absence (black) or presence (red) of bio-AuNPs/rGO.

## References

1. F. Luan, W. D. Burgos, L. Xie and Q. Zhou, *Environ. Sci. Technol.*, 2009, **44**, 184-190.
2. P. Cai, X. Xiao, Y. He, W. Li, L. Yu, M. H.W. Lam and H. Yu, *Biochem. Eng. J.*, 2012, **68**, 227-230.
3. J. Wang, H. Lu, Y. Zhou, Y. Song, G. Liu and Y. Feng, *J. Hazard. Mater.*, 2013, **252**, 227-232.
4. F. Yan, Y. He, C. Wu, Y. Cheng, W. Li and H. Yu, *Environ. Sci. Technol. Lett.*, 2014, **1**, 128-132.
